# Supplementary material for: mRNA and miRNA Expression Analysis Reveal the Regulation for Flower Spot Patterning in Phalaenopsis ‘Panda’
Source: PubMed Central journal article supplement (PMC6747512; doi:10.3390/ijms20174250), 2019-08-30
Supplement: ijms-20-04250-s001.pdf [file ijms-20-04250-s001.pdf]

## Supplementary Materials:

**Table S1.** Summary of transcriptome sequencing data.

| Sample    | Raw Reads  | Clean Reads | Clean Base (Gb) | Q20 (%) | Q30 (%) | Clean Reads Ratio (%) |
|-----------|------------|-------------|-----------------|---------|---------|-----------------------|
| Nonspot-A | 55,765,564 | 44,632,028  | 6.69            | 98.03   | 93.91   | 80.04                 |
| Nonspot-B | 57,355,802 | 45,110,536  | 6.77            | 97.93   | 93.61   | 78.65                 |
| spot-A    | 57,715,006 | 45,380,086  | 6.81            | 98.03   | 93.91   | 78.63                 |
| spot-B    | 57,355,434 | 44,434,116  | 6.67            | 97.91   | 93.53   | 77.47                 |

Q20 (%): the ratio of bases with Phred values greater than 20 to the total base. Q30 (%): the ratio of bases with Phred values greater than 30 to the total base.

**Table S2.** Summary of mapping ratio.

| Sample    | Total Mapping Ratio | Uniquely Mapping Ratio |
|-----------|---------------------|------------------------|
| Nonspot-A | 51.71%              | 29.83%                 |
| Nonspot-B | 55.81%              | 32.16%                 |
| spot-A    | 58.38%              | 33.90%                 |
| spot-B    | 55.98%              | 32.18%                 |

**Table S3.** Functional Annotation in NR, KEGG, GO database.

| Total  | NR     | GO     | KRGG   |
|--------|--------|--------|--------|
| 22,188 | 17,871 | 15,588 | 19,864 |

**Table S4.** The KEGG analysis of DEGs and the most enrichment pathway (top 20).

| NO.       | Pathway                                               | Gene_N<br>umber | Background_Gene_<br>Number | RichFactor      | Q-value                                 |
|-----------|-------------------------------------------------------|-----------------|----------------------------|-----------------|-----------------------------------------|
| 1         | Photosynthesis - antenna proteins                     | 12              | 18                         | 0.6666667       | $2.62 \times 10^{-13}$                  |
| 2         | Phenylpropanoid biosynthesis                          | 45              | 512                        | 0.0878906       | $2.94 \times 10^{-10}$                  |
| 3         | Metabolic pathways                                    | 191             | 4806                       | 0.039742        | $1.37 \times 10^{-7}$                   |
| 4         | Biosynthesis of secondary metabolites                 | 109             | 2430                       | 0.044856        | $2.31 \times 10^{-6}$                   |
| 5         | Photosynthesis                                        | 16              | 116                        | 0.137931        | $2.31 \times 10^{-6}$                   |
| <b>6</b>  | <b>Flavonoid biosynthesis</b>                         | <b>12</b>       | <b>105</b>                 | <b>0.114286</b> | <b><math>5.28 \times 10^{-4}</math></b> |
| 7         | Glycerolipid metabolism                               | 19              | 266                        | 0.0714286       | $2.14 \times 10^{-3}$                   |
| 8         | Porphyrin and chlorophyll metabolism                  | 11              | 123                        | 0.0894309       | $7.44 \times 10^{-3}$                   |
| 9         | Starch and sucrose metabolism                         | 34              | 701                        | 0.0485021       | $1.11 \times 10^{-2}$                   |
| 10        | ABC transporters                                      | 15              | 235                        | 0.0638298       | $2.23 \times 10^{-2}$                   |
| 11        | Plant-pathogen interaction                            | 36              | 797                        | 0.0451694       | $2.23 \times 10^{-2}$                   |
| 12        | Amino sugar and nucleotide sugar metabolism           | 19              | 341                        | 0.0557185       | $2.48 \times 10^{-2}$                   |
| 13        | Regulation of autophagy                               | 10              | 156                        | 0.0641026       | $8.79 \times 10^{-2}$                   |
| 14        | Terpenoid backbone biosynthesis                       | 9               | 137                        | 0.0656934       | $9.90 \times 10^{-2}$                   |
| 15        | Stilbenoid, diarylheptanoid and gingerol biosynthesis | 7               | 100                        | 0.07            | $1.40 \times 10^{-1}$                   |
| <b>16</b> | <b>Phenylalanine metabolism</b>                       | <b>8</b>        | <b>132</b>                 | <b>0.060606</b> | <b><math>1.90 \times 10^{-1}</math></b> |
| 17        | Cyanoamino acid metabolism                            | 9               | 159                        | 0.0566038       | $1.93 \times 10^{-1}$                   |
| 18        | Tryptophan metabolism                                 | 5               | 66                         | 0.0757576       | $2.02 \times 10^{-1}$                   |
| 19        | Limonene and pinene degradation                       | 5               | 73                         | 0.0684932       | $2.68 \times 10^{-1}$                   |
| 20        | Glycerophospholipid metabolism                        | 10              | 202                        | 0.049505        | $2.68 \times 10^{-1}$                   |

**Table S5.** Summary of miRNA transcriptome sequencing data.

| Sample    | Raw Tag    | Clean Tag  | Clean Base Ratio (%) |
|-----------|------------|------------|----------------------|
| Nonspot-A | 26,663,561 | 23,352,936 | 87.58                |
| Nonspot-B | 26,865,118 | 24,896,769 | 92.67                |
| spot-A    | 28,739,122 | 26,605,438 | 92.58                |
| spot-B    | 27,644,225 | 25,926,370 | 93.79                |

**Table S6.** Summary of mapping ratio of clean tag.

| Sample    | Clean Tag  | Total Mapped Tag | Percentage (%) |
|-----------|------------|------------------|----------------|
| Nonspot-A | 23,352,936 | 18,062,942       | 77.35          |

|           |            |            |       |
|-----------|------------|------------|-------|
| Nonspot-B | 24,896,769 | 19,039,072 | 76.47 |
| spot-A    | 26,605,438 | 21,395,134 | 80.42 |
| spot-B    | 25,926,370 | 19,516,924 | 75.28 |

**Table S7.** mRNA QPCR primer.

| <b>Primers</b> | <b>Primer Sequences (5'-3')</b> |
|----------------|---------------------------------|
| PeAct4 real F  | TTGTGAGCAACTGGGATGACAT          |
| PeAct4 real R  | GCCACGCGAAGTTCATTGT             |
| PeMYB2 real F  | ATGGTTGTTACCTTCCTGATGATGAGAAC   |
| PeMYB2 real R  | TTCCACCAGTCCTCCTCCTTC           |
| PeMYB7 real F  | CAAGGGAGCATGGACCAAGGAAG         |
| PeMYB7 real R  | TTTGAGATCGGGACGGAGGTAAT         |
| PeMYB12 real F | AACAAAAGTAGACGCAGCACTACCAAC     |
| PeMYB12 real R | TTGGGACGGATCATTTCAGCC           |
| PeMYB16 real F | ACTTTCCTCAGCAGCATCTACC          |
| PeMYB16 real R | GGCTTCCAGCTTGGCTATTATCT         |
| PeCHI real R   | GGTGATAAAGGAGATCAAGGGTT         |
| PeCHI real R   | GCTGTAGAAGAAGTTGCAGGAAA         |
| PeF3H real F   | TCATTACCTGAGCAACGGTCGG          |
| PeF3H real R   | AACGCCCGCATCGAAAGCC             |
| PeDFR real F   | TTGAGGATATGTTTGATGATGCTATTAAG   |
| PeDFR real R   | TTCTCAGTGTGGCGGTAAGAG           |
| PeANS real F   | TGCCACAGCGTTCTTACCG             |
| PeANS real R   | AAACCGCCACGAGATCCGTAC           |
| PeC4H real F   | TGCTGCCATTGAGACAACCCTGTG        |
| PeC4H real R   | GCGATGGATGTCCGGCTCTGTGA         |
| PeFLS real F   | GAGTACGGGAGGCAGATGGTGAG         |
| PeFLS real R   | CGGGTTGCGGGCATTTAGGATAG         |
| PeF3'H real F  | GCCCTGCTGGCTTGGCTTGATT          |
| PeF3'H real R  | TCCACCATTGACTTCGCCGTTCT         |
| Pe4CL real F   | GGGCCAGTGCTATCAATGTGCTT         |
| Pe4CL real R   | CCAGGCTGATTGTAGCCAAGGGA         |
| Pe4CL2 real F  | GGGTACGTGGATGATGACGAGGAG        |
| Pe4CL2 real R  | GAGACTACGGCAGAATCGGCTATGTT      |
| PebHLH real F  | TCAACTCCACAATGGCTAATGGCAAG      |
| PebHLH real R  | ATTTATTTCACGAATGCTGGCTCTC       |

**Table S8.** miRNA QPCR primer.

| <b>Primers</b> | <b>Primer Sequences (5'-3')</b>                     |
|----------------|-----------------------------------------------------|
| PeU6_F         | CATCCGATAAAAATTGGAACGA                              |
| PeU6_R         | TTTGTGCGTGCATCCTTGCG                                |
| PemiR858_F     | GCGGGCTTTCGTGTCTGTT                                 |
| PemiR858_R     | GTGCAGGGTCCGAGGT                                    |
| PemiR858-RT    | GTTGGCTCTGGTGCAGGGTCCGAGGTATTTCGCACCAGAGCCAACAAGGTC |
| PemiR156g_F    | GCGGGCGCTCTCTAGACTTCT                               |
| PemiR156g_R    | GCTCTCTAGACTTCTGTTCATC                              |
| PemiR156g-RT   | GTTGGCTCTGGTGCAGGGTCCGAGGTATTTCGCACCAGAGCCAACCATGAC |
